# Supplementary material
Source: PubMed Central journal article supplement (PMC2347382)
Supplement: jbacter_190_9_3399__3.pdf [file jbacter_190_9_3399__3.pdf]

**SUPPLEMENTAL TABLE 1. *E. coli* strains used in this study**

| Strain  | Relevant genotype                                                                                                                | Source or construction                                                                |
|---------|----------------------------------------------------------------------------------------------------------------------------------|---------------------------------------------------------------------------------------|
| FB20884 | <i>recA::Tn5KAN-I-SceI</i>                                                                                                       | U. Wisconsin <i>E. coli</i> Genome Project                                            |
| RW126   | <i>recA718 srlC300::Tn10</i><br><i>lexA71(Def)::Tn5 (umuDC)594::cat</i>                                                          | R. Woodgate (21)                                                                      |
| SS446   | <i>recB268::Tn10</i>                                                                                                             | S. Sandler <sup>1</sup>                                                               |
| JD27347 | <i>recF::miniTn10 (kan)</i>                                                                                                      | National BioResource Project (NIG, Japan) : <i>E. coli</i> (Miki, T. to be published) |
| JD20690 | <i>recR::miniTn10 (kan)</i>                                                                                                      | National BioResource Project (NIG, Japan) : <i>E. coli</i> (Miki, T. to be published) |
| BW27784 | DE( <i>araBAD</i> )567 DE( <i>rhaBAD</i> )568<br>DE( <i>araFGH</i> ) $\Phi(\Delta$ <i>araEpP</i> <sub>CP18</sub> - <i>araE</i> ) | Yale <i>E. coli</i> Genetic Stock Center (15)                                         |
| YT101   | BW27784 <i>recA::Tn5KAN-I-SceI</i>                                                                                               | P1(FB20884) x BW27784, Kan resistance                                                 |
| YT102   | BW27784 <i>recB268::Tn10</i>                                                                                                     | P1(SS446) x BW27784, Tet resistance                                                   |
| JHS1    | BW27784 <i>recA718 srlC300::Tn10</i>                                                                                             | P1(RW126) x BW27784, Tet resistance                                                   |
| JHS2    | BW27784 <i>recF::miniTn10(kan)</i>                                                                                               | P1(JD27347) x BW27784, Kan resistance                                                 |
| JHS3    | BW27784 <i>recR::miniTn10(kan)</i>                                                                                               | P1(JD20690) x BW27784, Kan resistance                                                 |

<sup>1</sup> McCool, J. D. and S. J. Sandler. 2001. Effects of mutations involving cell division, recombination, and chromosome dimer resolution on a *priA2::kan* mutant. Proc. Natl. Acad. Sci. U. S. A. **98**:8203-8210.
