# Supplementary material
Source: PubMed Central journal article supplement (PMC2347382)

**A**

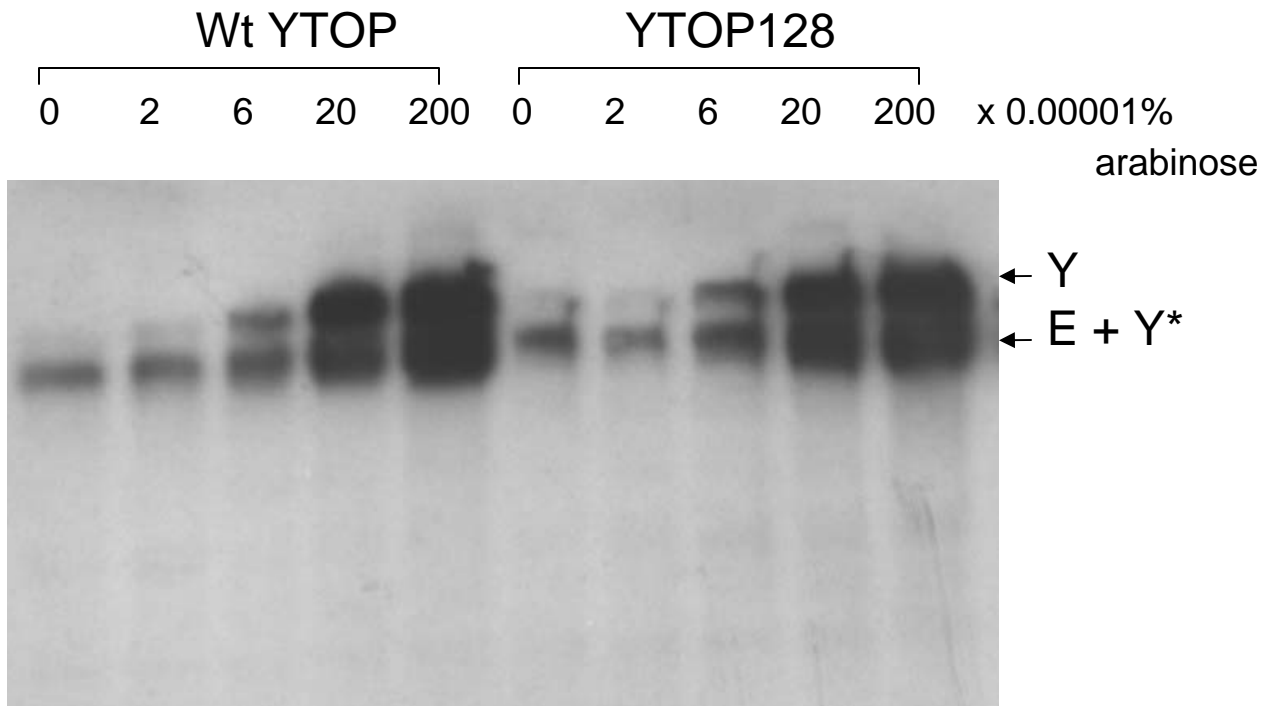

Anti-*E. coli* topoisomerase I

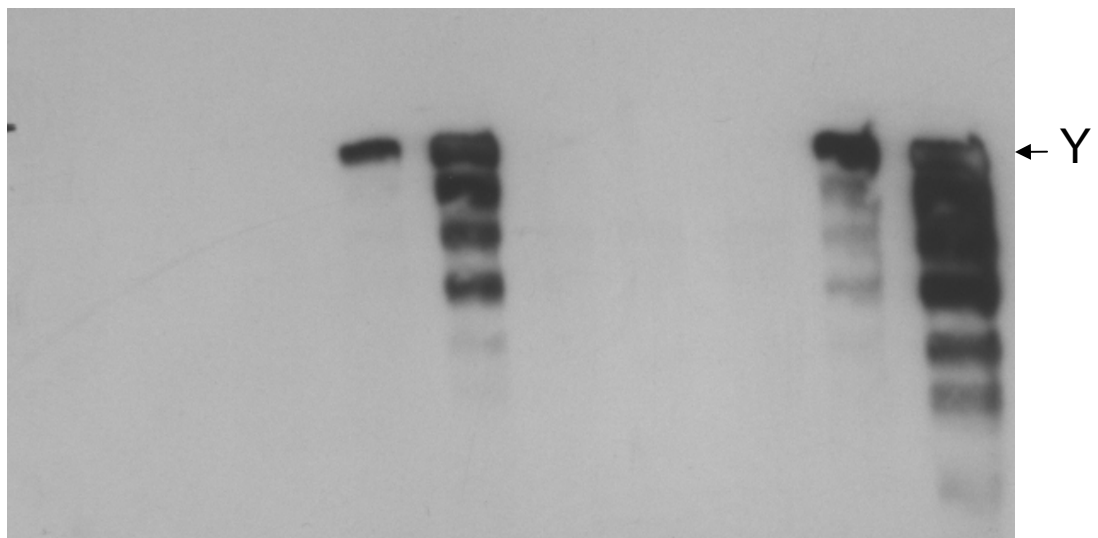

Anti-thioredoxin

Supplement: jbacter_190_9_3399__1.pdf [file jbacter_190_9_3399__1.pdf]

**B**

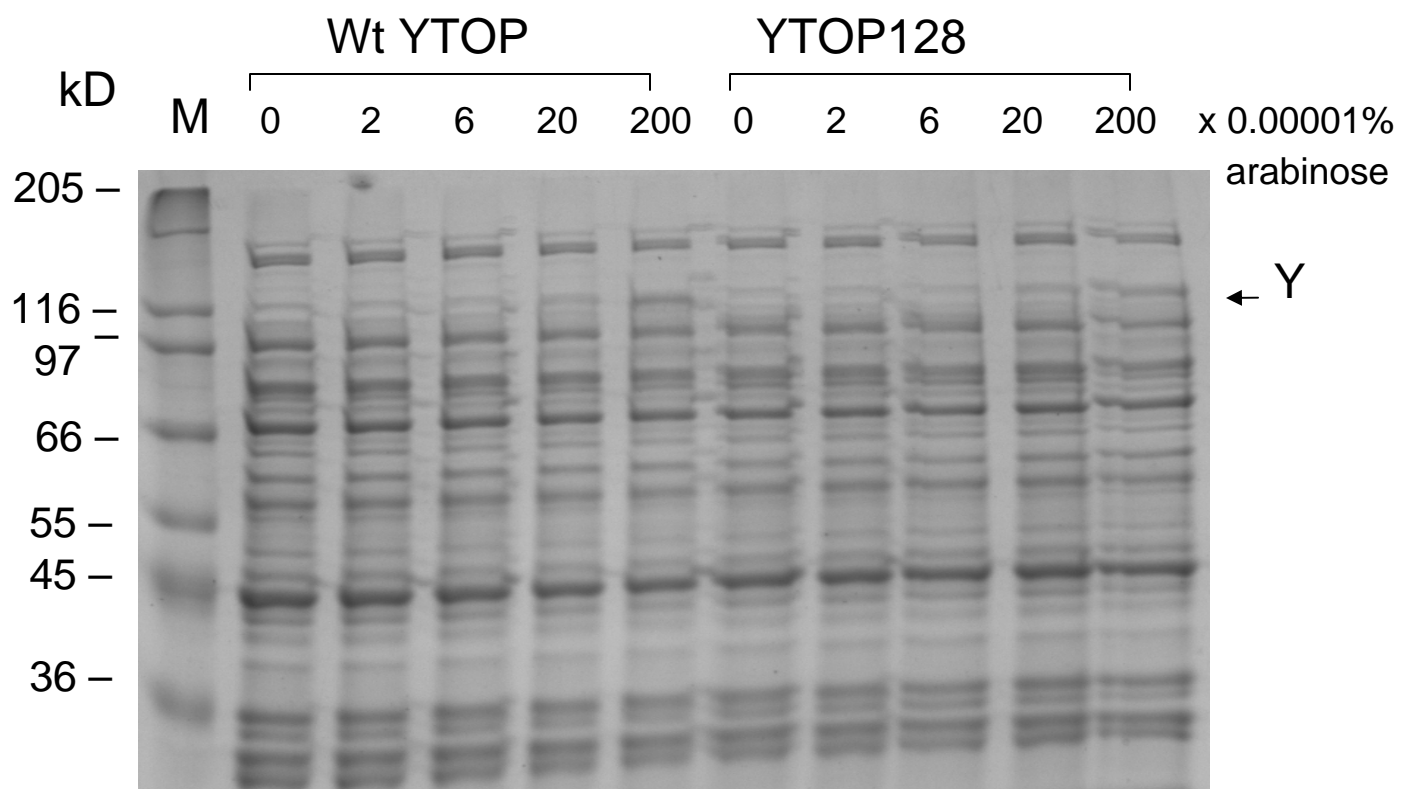

Supplement: jbacter_190_9_3399__2.pdf [file jbacter_190_9_3399__2.pdf]
